# Supplementary material for: MicroRNA-182 Alleviates Neuropathic Pain by Regulating Nav1.7 Following Spared Nerve Injury in Rats
Source: PubMed Central journal article supplement (PMC6233159; doi:10.1038/s41598-018-34755-3), 2018-11-13
Supplement: 41598_2018_34755_MOESM1_ESM.pdf [file 41598_2018_34755_MOESM1_ESM.pdf]

## **Supplementary Information Titles**

**Journal:** Scientific reports

**Article Title:** MicroRNA-182 Alleviates Neuropathic Pain by Regulating Nav1.7 Following Spared Nerve Injury in Rats

**Authors:** Weihua Cai, Qingzan Zhao, Jinping Shao, Jingjing Zhang, Lei Li, Xiuhua Ren, Songxue Su, Qian Bai, Ming Li, Xuemei Chen, Jian Wang, Jing Cao, Weidong Zang

**Corresponding Author:** Weidong Zang, Jing Cao

### **Supplementary Item & Number:**

- 1. Supplementary figure 1** Full western blot images.
- 2. Supplementary figure 2** Uptake of chemical modified small RNA sequence (miR-137 negative control) in DRG cells.

## Supplementary figure 1

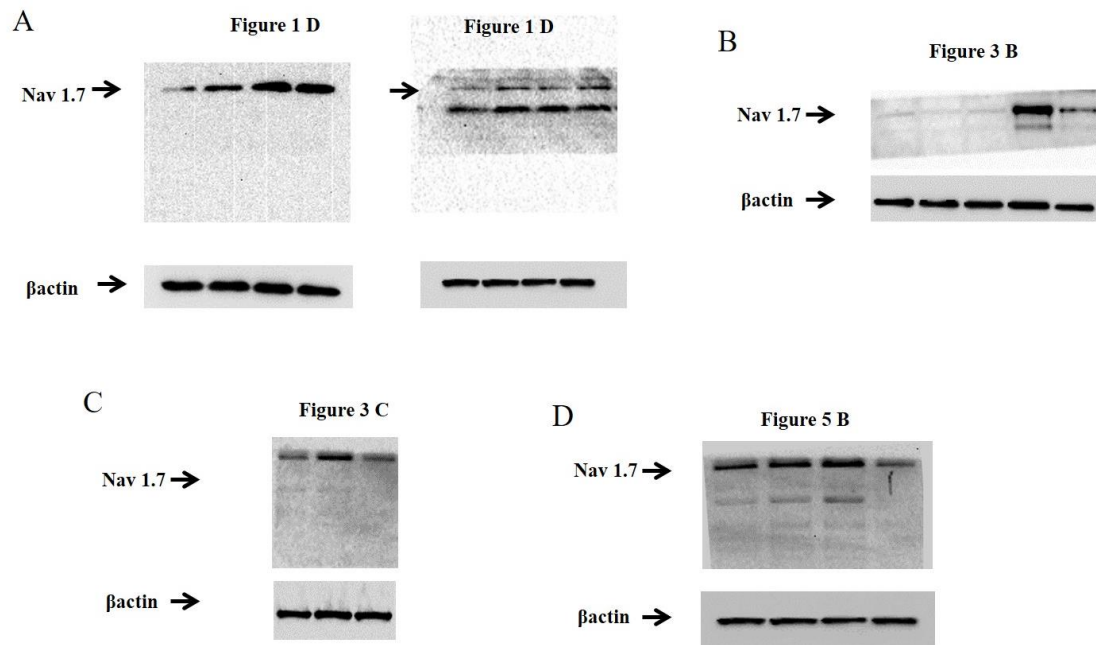

**Supplementary figure 1** The original image of western blot results. (A-D) Original images for the results presented in Figure 1D (A), Figure 3B (B), Figure 3C (C) and Figure 5B (D).

**Supplementary figure 2**

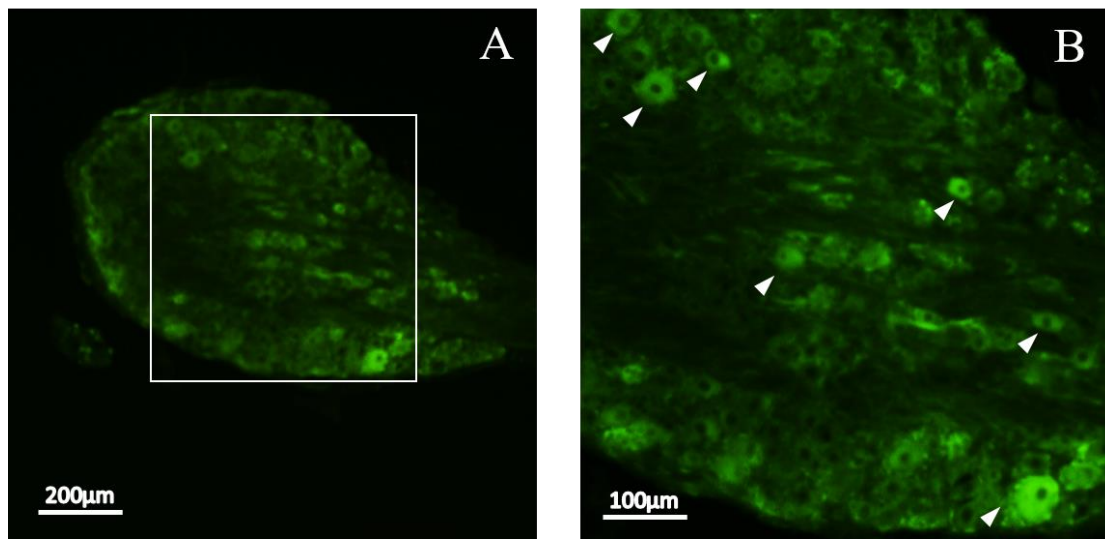

**Supplementary figure 2** Uptake of chemical modified exogenous small RNA sequence (miR-137 negative control) in DRG cells. (A) Representative slice image. (B) The high magnification of area framed in A. White triangle: positive neurons.
